# Supplementary material for: China Wildfire Emission Dataset (ChinaWED v1) for the period 2012–2022
Source: Copernicus journal article supplement (doi:10.5194/gmd-18-2509-2025), 2025-05-06
Supplement: Supplementary file 1 [file gmd-18-2509-2025-supplement.zip]

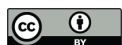

*Supplement of*

## **China Wildfire Emission Dataset (ChinaWED v1) for the period 2012–2022**

**Zhengyang Lin et al.**

*Correspondence to:* Xuhui Wang (xuhui.wang@pku.edu.cn)

- gmd-18-2509-2025-supplement-title-page.pdf
- Emissions Supplement.docx

The copyright of individual parts of the supplement might differ from the article licence.
